# Supplementary material
Source: HighWire-hosted journal article supplement (https://www.jrheum.org/highwire/filestream/37647/field_highwire_adjunct_files/0/190729DataSuppl.pdf)
Supplement: 190729DataSuppl.pdf [file 190729DataSuppl.pdf]

**ONLINE SUPPLEMENTARY DATA**

**Supplementary Table 1. Demographic data of the 206 psoriatic arthritis patients and 179 controls**

|                                           | Controls=179  | Psoriatic arthritis=206 | p            |
|-------------------------------------------|---------------|-------------------------|--------------|
| <b>Demographics</b>                       |               |                         |              |
| Male, n (%)                               | 90 (50)       | 91 (44)                 | 0.23         |
| Age, years                                | 41 ± 9        | 45 ± 8                  | <b>0.000</b> |
| BMI, mg/cm <sup>2</sup>                   | 25.4 ± 4.2    | 26.9 ± 5.8              | <b>0.010</b> |
| Waist circumference, cm                   | 8+E70         | 94 ± 15                 | <b>0.048</b> |
| Systolic pressure, mmHg                   | 121 ± 13      | 129 ± 18                | <b>0.000</b> |
| Diastolic pressure, mmHg                  | 76 ± 9        | 77 ± 11                 | 0.237        |
| <b>Comorbidity</b>                        |               |                         |              |
| Hypertension, n (%)                       | 21 (12)       | 76 (37)                 | <b>0.000</b> |
| Dyslipidemia, n (%)                       | 106 (59)      | 114 (55)                | 0.48         |
| Current smoking, n (%)                    | 32 (18)       | 58 (28)                 | <b>0.017</b> |
| Diabetes, n (%)                           | 4 (2)         | 21 (10)                 | <b>0.002</b> |
| BMI > 30, n (%)                           | 25 (14)       | 42 (20)                 | <b>0.020</b> |
| <b>Laboratory data</b>                    |               |                         |              |
| ESR, mm/h                                 | 5 (2-9)       | 6 (3-12)                | <b>0.002</b> |
| hsCRP, mg/l                               | 0.8 (0.5-2.0) | 0.3 (0.1-0.8)           | <b>0.006</b> |
| Cholesterol, mg/dl                        | 199 ± 34      | 189 ± 30                | <b>0.006</b> |
| Triglycerides, mg/dl                      | 103 ± 56      | 102 ± 52                | 0.83         |
| LDL, mg/dl                                | 119 ± 31      | 111 ± 34                | <b>0.023</b> |
| HDL, mg/dl                                | 59 ± 17       | 57 ± 17                 | 0.27         |
| Atherogenic index                         | 3.62 ± 1.06   | 3.94 ± 5.89             | 0.49         |
| <b>Psoriatic arthritis-related data</b>   |               |                         |              |
| Type of psoriatic arthritis               |               |                         |              |
| Peripheral oligoarthritis                 |               | 19 (9)                  |              |
| Peripheral polyarthritis                  |               | 124 (60)                |              |
| Spondylitis                               |               | 30 (15)                 |              |
| Mixed                                     |               | 30 (15)                 |              |
| Disease duration, years                   |               | 4.6 (2.0-10.9)          |              |
| Psoriasis at the time of the study, n (%) |               | 151 (73)                |              |
| HLA-B27 positive, n (%)                   |               | 20 (10)                 |              |
| ANA positive, n (%)                       |               | 15 (7)                  |              |
| Rheumatoid factor, n (%)                  |               | 29 (14)                 |              |
| Positive family history of PsA, n (%)     |               | 69 (33)                 |              |
| BASDAI, total score                       |               | 2.2 (0.0-4.7)           |              |
| BASDAI >4, n (%)                          |               | 31 (15)                 |              |
| BASFI, total score                        |               | 0 (0-3)                 |              |
| PsAID, total score                        |               | 1-0 (0.0-2.9)           |              |
| DAPSA, total score                        |               | 4.2 (0.1-13.0)          |              |
| BSA, total score                          |               | 0.75 (0.00-2.05)        |              |
| PASI, total score                         |               | 0.45 (0.00-2.00)        |              |

|                                        |               |               |              |
|----------------------------------------|---------------|---------------|--------------|
| NAPSI, total score                     |               | 0.0 (0.0-3.1) |              |
| PGA, total score                       |               | 0 (0-1)       |              |
| Number of swelling joints              |               |               |              |
| 0, n (%)                               |               | 63 (31)       |              |
| 1-5, n (%)                             |               | 46 (22)       |              |
| > 5, n (%)                             |               | 10 (5)        |              |
| Axial symptoms, n (%)                  |               | 70 (34)       |              |
| Peripheral symptoms, n (%)             |               | 150 (73)      |              |
| Hip symptoms, n (%)                    |               | 44 (21)       |              |
| Enthesitis, n (%)                      |               | 78 (38)       |              |
| Uveitis, n (%)                         |               | 13 (6)        |              |
| Dactylitis, n (%)                      |               | 51 (25)       |              |
| Inflammatory bowel disease, n (%)      |               | 14 (7)        |              |
| Sacroiliitis on MRI, n (%)             |               | 26 (13)       |              |
| Sacroiliitis in x-ray grade            |               |               |              |
| Grade I, n (%)                         |               | 102 (50)      |              |
| Grade II, n (%)                        |               | 11 (5)        |              |
| Grade III, n (%)                       |               | 12 (6)        |              |
| Grade IV, n (%)                        |               | 4 (2)         |              |
| Syndesmophytes in axial x-ray, n (%)   |               | 7 (3)         |              |
| Current NSAIDs, n (%)                  |               | 162 (79)      |              |
| Current prednisone, n (%)              |               | 85 (41)       |              |
| DMARDs, n (%)                          |               | 154 (75)      |              |
| Methotrexate, n (%)                    |               | 139 (67)      |              |
| Leflunomide, n (%)                     |               | 49 (24)       |              |
| Salazopyrin, n (%)                     |               | 37 (18)       |              |
| Anti TNF therapy, n (%)                |               | 87 (42)       |              |
| Secunikumab, n (%)                     |               | 14 (7)        |              |
| Ustenikumab, n (%)                     |               | 4 (2)         |              |
| Ixezumab, n (%)                        |               | 5 (2)         |              |
| Tofacitinib, n (%)                     |               | 7 (3)         |              |
| Apremilast, n (%)                      |               | 10 (5)        |              |
| <b>Carotid intima media assessment</b> |               |               |              |
| Carotid plaque, n (%)                  | 47 (26)       | 100 (49)      | <b>0.000</b> |
| bilateral, n (%)                       | 20 (11)       | 56 (27)       | <b>0.000</b> |
| cIMT, mm                               | 0.606 ± 0.116 | 0.679 ± 0.165 | <b>0.000</b> |

Data represent means ± SD or median (IQR) when data were not normally distributed.

BMI: body mass index; CRP: C-reactive protein; LDL: low-density lipoprotein.

DMARD: disease-modifying antirheumatic drug.

HDL: high-density lipoprotein; ANA: antinuclear antibodies; hsCRP: high-sensitivity C-reactive protein

cIMT, carotid intima media thickness; BASFI: Bath Ankylosing Spondylitis Functional Index.

BASDAI: Bath Ankylosing Spondylitis Disease Activity Index.

NAPSI: Nail Psoriasis Severity Index; BSA: Body Surface Area.

PGA: Psoriasis Global Assessment; PsAID: PsA Impact of Disease Score.

DAPSA: Disease Activity in PSoriatic Arthritis.

**Supplementary Table 2. SCORE risk category re-classification after carotid ultrasonography depending on anti-TNF alpha treatment patients**

| Initial SCORE risk category  | SCORE Risk Category after Carotid Ultrasound Assessment |            |           |           |           | % patients being reclassified | p*           |
|------------------------------|---------------------------------------------------------|------------|-----------|-----------|-----------|-------------------------------|--------------|
|                              | Low                                                     | Moderate   | High      | Very high |           |                               |              |
| <b>Controls</b>              |                                                         |            |           |           |           |                               |              |
| Low                          | 139                                                     | 120        | 0         | 0         | 19        | 13,7%                         |              |
| Moderate                     | 28                                                      | 0          | 10        | 0         | 18        | 64,3%                         |              |
| High                         | 12                                                      | 0          | 0         | 2         | 10        | 83,3%                         |              |
| Very High                    | 0                                                       | 0          | 0         | 0         | 0         | -                             |              |
| <b>Total</b>                 | <b>179</b>                                              | <b>120</b> | <b>10</b> | <b>2</b>  | <b>47</b> | <b>26,3%</b>                  |              |
| <b>Non anti-TNF patients</b> |                                                         |            |           |           |           |                               |              |
| Low                          | 53                                                      | 34         | 0         | 0         | 19        | 35,8%                         | <b>0.001</b> |
| Moderate                     | 45                                                      | 0          | 14        | 0         | 31        | 68,9%                         | 0.68         |
| High                         | 14                                                      | 0          | 0         | 4         | 10        | 71,4%                         | 0.65         |
| Very High                    | 7                                                       | 0          | 0         | 0         | 7         | -                             | -            |
| <b>Total</b>                 | <b>119</b>                                              | <b>34</b>  | <b>14</b> | <b>4</b>  | <b>67</b> | <b>56,3%</b>                  | <b>0.000</b> |
| <b>On anti-TNF patients</b>  |                                                         |            |           |           |           |                               |              |
| Low                          | 48                                                      | 37         | 0         | 0         | 11        | 22,9%                         | 0.13         |
| Moderate                     | 33                                                      | 0          | 10        | 0         | 23        | 69,7%                         | 0.48         |
| High                         | 5                                                       | 0          | 0         | 3         | 2         | 40,0%                         | 0.074        |
| Very High                    | 1                                                       | 0          | 0         | 0         | 1         | -                             |              |
| <b>Total</b>                 | <b>87</b>                                               | <b>37</b>  | <b>10</b> | <b>3</b>  | <b>37</b> | <b>42,5%</b>                  | <b>0.007</b> |

SCORE: Systematic Coronary Risk Evaluation

\*p values refer to the comparison between patients on anti-TNF alpha treatment or not and controls for each SCORE category

**Supplementary Table 3. Differences between reclassified and non-reclassified patients with PsA into the very high CV risk category following carotid ultrasound assessment.**

|                                          | Reclassification into Very High–Risk after Carotid Ultrasound |               |              | Adjusted Model OR (95% CI) | p |
|------------------------------------------|---------------------------------------------------------------|---------------|--------------|----------------------------|---|
|                                          | No (n = 109)                                                  | Yes (n = 97)  | p            |                            |   |
| cIMT, carotid intima media thickness, mm | 0.638 ± 0.162                                                 | 0.725 ± 157   | <b>0.000</b> |                            |   |
| <b>Demographics</b>                      |                                                               |               |              |                            |   |
| Male, n (%)                              | 44                                                            | 47            | 0.24         |                            |   |
| Age, years                               | 50 ± 13                                                       | 57 ± 9        | <b>0.000</b> |                            |   |
| BMI, mg/cm <sup>2</sup>                  | 27.7 ± 6.8                                                    | 27.9 ± 6.6    | 0.89         |                            |   |
| Waist circumference, cm                  | 94 ± 15                                                       | 94 ± 20       | 0.91         |                            |   |
| Systolic pressure, mmHg                  | 137 ± 22                                                      | 136 ± 19      | 0.74         |                            |   |
| Diastolic pressure, mmHg                 | 79 ± 13                                                       | 80 ± 11       | 0.63         |                            |   |
| <b>Comorbidity</b>                       |                                                               |               |              |                            |   |
| Hypertension, n (%)                      | 24 (22)                                                       | 52 (54)       | <b>0.000</b> |                            |   |
| Dyslipidemia, n (%)                      | 64 (59)                                                       | 50 (52)       | 0.15         |                            |   |
| Current smoking, n (%)                   | 30 (28)                                                       | 28 (29)       | 0.83         |                            |   |
| Diabetes, n (%)                          | 7 (6)                                                         | 14 (14)       | 0.058        |                            |   |
| BMI > 30, n (%)                          | 15 (14)                                                       | 27 (28)       | <b>0.011</b> |                            |   |
| Statins, n (%)                           | 32 (29)                                                       | 80 (82)       | <b>0.000</b> |                            |   |
| <b>Laboratory data</b>                   |                                                               |               |              |                            |   |
| ESR, mm/h                                | 7 (4-13)                                                      | 5 (3-11)      | 0.94         |                            |   |
| hsCRP, mg/l                              | 0.3 (0.1-0.8)                                                 | 0.2 (0.1-0.7) | 0.19         |                            |   |
| Cholesterol, mg/dl                       | 197 ± 36                                                      | 179 ± 40      | <b>0.001</b> |                            |   |
| Triglycerides, mg/dl                     | 96 ± 39                                                       | 108 ± 62      | 0.10         |                            |   |
| LDL, mg/dl                               | 116 ± 35                                                      | 106 ± 34      | <b>0.032</b> |                            |   |
| HDL, mg/dl                               | 58 ± 17                                                       | 55 ± 17       | 0.32         |                            |   |

|                                         |                   |                   |              |                         |              |
|-----------------------------------------|-------------------|-------------------|--------------|-------------------------|--------------|
| Atherogenic index                       | 3.40 (2.72-4.12)  | 3.34 (2.71-4.13)  | 0.27         |                         |              |
| <b>Psoriatic arthritis-related data</b> |                   |                   |              |                         |              |
| Type of psoriatic arthritis             |                   |                   |              |                         |              |
| Peripheral oligoarthritis               | 14 (13)           | 5 (5)             |              |                         |              |
| Peripheral polyarthritis                | 55 (50)           | 69 (71)           | <b>0.001</b> |                         |              |
| Spondylitis                             | 15 (14)           | 15 (15)           |              |                         |              |
| Mixed                                   | 24 (22)           | 6 (6)             |              |                         |              |
| Disease duration, years                 | 4.1 (1.4-8.0)     | 5.7 (2.2-12.5)    | <b>0.023</b> | 1.00 (0.97-1.02)        | 0.77         |
| Psoriasis, n (%)                        | 76 (70)           | 75 (77)           | 0.093        | 1.66 (0.65-4.25)        | 0.30         |
| HLA-B27, n (%)                          | 17 (16)           | 3 (3)             | <b>0.004</b> | 0.17 (0.03-1.06)        | 0.058        |
| ANA positive, n (%)                     | 8 (7)             | 7 (7)             | 0.81         | 1.89 (0.31-11.53)       | 0.49         |
| Rheumatoid factor, n (%)                | 13 (12)           | 16 (16)           | 0.27         | 2.62 (0.82-8.39)        | 0.11         |
| Positive family history of PsA, n (%)   | 40 (37)           | 29 (30)           | 0.23         | 0.76 (0.29-1.96)        | 0.56         |
| BASDAI, total score                     | 2.65 (0.00-5.70)  | 1.4 (0.0-3.8)     | 0.21         | 0.92 (0.74-1.13)        | 0.41         |
| BASDAI >4, n (%)                        | 19 (17)           | 12 (12)           | 0.19         | 0.54 (0.16-1.84)        | 0.33         |
| BASFI, total score                      | 0.3 (0.0-3.5)     | 0.0 (0.0-2.1)     | 0.40         | 0.88 (0.70-1.11)        | 0.27         |
| PsAID, total score                      | 1.0 (0.0-3.2)     | 1.0 (0.0-2.0)     | 0.11         | 1.03 (0.77-1.37)        | .87          |
| DAPSA, total score                      | 1.92 (0.00-10.01) | 6.10 (0.05-15.10) | 0.056        | <b>1.10 (1.02-1.19)</b> | <b>0.019</b> |
| Remission, n (%)                        | 35 (32)           | 23 (24)           |              | -                       | -            |
| Low, moderate or high activity, n (%)   | 23 (21)           | 32 (33)           | <b>0.049</b> | <b>3.22 (1.05-9.90)</b> | <b>0.041</b> |
| DAPSA, total score                      |                   |                   |              |                         |              |

|                                      |               |               |             |                            |          |
|--------------------------------------|---------------|---------------|-------------|----------------------------|----------|
| Remission, n (%)                     | 35 (32)       | 23 (24)       | 0.14        | -                          | -        |
| Low activity, n (%)                  | 13 (12)       | 17 (18)       |             | 1.50 (0.42-5.37)           | 0.53     |
|                                      |               |               |             | <b>0.01</b>                |          |
| Moderate or high activity, n (%)     | 10 (9)        | 15 (15)       |             | <b>15.09 (1.69-135.08)</b> | <b>5</b> |
| BSA, total score                     | 0.5 (0.0-2.9) | 0.9 (0.0-2.0) | 0.30        | 0.79 (0.52-1.22)           | 0.29     |
| PASI, total score                    | 0.8 (0.0-2.1) | 0.2 (0.02-0)  | 0.30        | 0.73 (0.51-1.04)           | 0.73     |
| Low                                  | 42 (39)       | 44 (45)       |             | -                          | -        |
|                                      |               |               | 0.27        |                            | 0.09     |
| Moderate and severe                  | 6 (6)         | 2 (2)         |             | 0.10 (0.01-1.48)           | 4        |
| NAPSI, total score                   | 0 (0-3)       | 0 (0-4)       | 0.43        | 1.08 (0.93-1.26)           | 0.45     |
| log PGA, total score                 | 0.37 ± 0.88   | 0.42 ± 0.64   | 0.82        | 180 (0.57-5.70)            | 0.32     |
| Number of swelling joints            |               |               |             |                            |          |
| 0, n (%)                             | 31 (28)       | 32 (33)       |             | -                          | -        |
| 1-5, n (%)                           | 26 (24)       | 20 (21)       | 0.30        | 0.65 (0.21-1.97)           | 0.44     |
| > 5, n (%)                           | 3 (3)         | 7 (7)         |             | 2.60 (0.31-21.94)          | 0.38     |
|                                      |               |               | <b>0.04</b> |                            |          |
| Axial symptoms, n (%)                | 44 (40)       | 26 (13)       | <b>6</b>    | 0.86 (0.36-2.07)           | 0.74     |
| Peripheral symptoms, n (%)           | 83 (76)       | 67 (33)       | 0.31        | 0.57 (0.22-7.85)           | 0.23     |
|                                      |               |               | 0.05        |                            | 0.06     |
| Hip symptoms, n (%)                  | 29 (27)       | 15 (7)        | 3           | 0.38 (0.14-1.07)           | 7        |
| Enthesitis, n (%)                    | 47 (43)       | 31 (15)       | 0.14        | 0.93 (0.39-2.°14)          | 0.87     |
| Uveitis, n (%)                       | 8 (7)         | 5 (2)         | 0.54        | 0.75 (0.17-3.39)           | 0.75     |
| Dactylitis, n (%)                    | 28 (26)       | 23 (11)       | 0.79        | 1.30 (0.47-3.58)           | 0.61     |
| Inflammatory bowel disease, n (%)    | 8 (7)         | 6 (3)         | 0.80        | 0.63 (0.15-2.60)           | 0.63     |
| Sacroiliitis on MRI, n (%)           | 17 (16)       | 9 (4)         | 0.21        | 0.74 (0.21-2.61)           | 0.64     |
| Sacroiliitis in x-ray grade          |               |               |             | 0.69 (0.20-2.39)           | 0.69     |
| Grade I, n (%)                       | 55 (50)       | 47 (48)       |             | -                          | -        |
| Grade ≥ II, n (%)                    | 16 (15)       | 11 (11)       | 0.62        | 0.72 (0.21-2.51)           | 0.60     |
| Syndesmophytes in axial x-ray, n (%) | 4 (4)         | 3 (3)         | 0.99        | 0.52 (0.08-3.34)           | 0.49     |
| Current NSAIDs, n (%)                | 91 (83)       | 71 (73)       | 0.12        | 0.45 (0.17-1.20)           | 0.11     |

|                           |         |          |      |                       |              |
|---------------------------|---------|----------|------|-----------------------|--------------|
| Current prednisone, n (%) | 44 (40) | 41 (42)  | 0.59 | 1.02 (0.45-6.74)      | 0.96<br>0.09 |
| DMARDs, n (%)             | 78 (72) | 76 (378) | 0.11 | 2.32 (0.87-6.24)      | 5            |
| Methotrexate, n (%)       | 71 (65) | 68 (70)  | 0.30 | 1.25 (0.52-3.03)      | 0.62         |
| Leflunomide, n (%)        | 26 (24) | 22 (23)  | 0.92 | 0.46 (0.18-1.22)      | 0.12         |
| Salazopyrin, n (%)        | 24 (22) | 13 (13)  | 0.13 | 0.72 (0.25-2.11)      | 0.55         |
| Anti TNF therapy, n (%)   | 50 (46) | 37 (38)  | 0.32 | 1.41 (0.57-3.52)      | 0.63         |
| Secunikumab, n (%)        | 9 (8)   | 5 (5)    | 0.45 | 1.28 (0.26-6.43)      | 0.76         |
| Ustenikumab, n (%)        | 1 (1)   | 3 (3)    | 0.66 | 0.34 (0.43-2.73)      | 0.31         |
| Ixekuzimab, n (%)         | 2 (2)   | 3 (3)    | 0.33 | -                     | -            |
| Tofacitinib, n (%)        | 3 (3)   | 4 (4)    | 0.71 | 8.42 (0.85-<br>83.51) | 0.06<br>9    |
| Apremilast, n (%)         | 4 (4)   | 6 (6)    | 0.52 | 3.30 (0.40-<br>27.05) | 0.27         |

Data represent means  $\pm$  SD or median (IQR) when data were not normally distributed.

BMI: body mass index; CRP: C reactive protein; LDL: low-density lipoprotein; hsCRP: high-sensitivity C-reactive protein

DMARD: disease-modifying antirheumatic drug; HDL: high-density lipoprotein; ANA: antinuclear antibodies.

cIMT, carotid intima media thickness; NAPSI: Nail Psoriasis Severity Index; BSA: Body Surface Area.

DAPSA: Disease Activity in PSoriatic Arthritis; BASDAI: Bath Ankylosing Spondylitis Disease Activity.

BASFI: Bath Ankylosing Spondylitis Functional Index; PGA: Psoriasis Global Assessment.

Adjusted model for age, hypertension, dyslipidemia, diabetes, obesity and statins.
